# Supplementary material for: Lessons from co-production of evidence and policy in Nigeria’s COVID-19 response
Source: HighWire-hosted journal article supplement (doi:10.1136/bmjgh-2020-004793), 2021-03-01
Supplement: bmjgh-2020-004793supp001_data_supplement.pdf [file bmjgh-2020-004793supp001_data_supplement.pdf]

**Supplementary Table.** Position papers, analytical approaches and major policy decisions

| Position Paper                                                           | Approaches used                           | Main Recommendation                                                                        | Major Policy Decisions                                                                                                                                                                                                                                                |
|--------------------------------------------------------------------------|-------------------------------------------|--------------------------------------------------------------------------------------------|-----------------------------------------------------------------------------------------------------------------------------------------------------------------------------------------------------------------------------------------------------------------------|
| <b>27<sup>th</sup> February to 30<sup>th</sup> May – Initial Actions</b> |                                           |                                                                                            |                                                                                                                                                                                                                                                                       |
| Lockdown                                                                 | Modelling, evidence review                | Approaches to inform cessation of movement                                                 | 1 <sup>st</sup> confirmed case (27 <sup>th</sup> February)<br>PTF established (March 9 <sup>th</sup> )<br>Initial limited travel ban (March 18 <sup>th</sup> )<br>School closures (March 18 <sup>th</sup> )<br>Lagos, FCT and Ogun lockdown (March 30 <sup>th</sup> ) |
| Population health and socio-economic well-being                          | Summary of bespoke surveys and literature | Informed decision socioeconomic support and precision lockdown                             | Food assistance and cash transfers (1 <sup>st</sup> April)                                                                                                                                                                                                            |
| Asymptomatic transmission                                                | Literature review and modelling           | Informed wider testing and isolation policy                                                | Testing and duration of isolation (20 <sup>th</sup> April)                                                                                                                                                                                                            |
| Continuation of lockdown                                                 | Modelling, evidence review                | 2-week extension of lockdown                                                               | International travel ban extended (March 23 <sup>rd</sup> )<br>Extension of lockdown to more states (April 2 <sup>nd</sup> )<br>Extension of lockdown in time (April 13 <sup>th</sup> )                                                                               |
| <b>4<sup>th</sup> May to 30<sup>th</sup> May – Phase 1</b>               |                                           |                                                                                            |                                                                                                                                                                                                                                                                       |
| Interventions post lockdown                                              | Modelling, country experience             | Choice of NPIs following relaxation of lockdown                                            | Gradual easing of lockdown initiated (4 <sup>th</sup> May)<br>Mandatory Mask wearing; mass gathering ban; ban interstate travel; curfews (May 4 <sup>th</sup> )                                                                                                       |
| Local strategy                                                           | Modelling                                 | Informed precision lockdown plans                                                          | Precision lockdown by states (18 <sup>th</sup> May)                                                                                                                                                                                                                   |
| Scaling up testing                                                       | Modelling, literature                     | Informed strategy for scaling up testing                                                   | Need to increase testing and new laboratories (May)                                                                                                                                                                                                                   |
| Africa epidemic size                                                     | Review of country experience              | Informed discussion on whether Africa is different                                         | No specific policy decision                                                                                                                                                                                                                                           |
| <b>1<sup>st</sup> June to 27<sup>th</sup> July – Phase 2</b>             |                                           |                                                                                            |                                                                                                                                                                                                                                                                       |
| Admission and discharge                                                  | Literature review                         | Informed decision on admission duration                                                    | Allowing self-isolation for non-severe cases (5 <sup>th</sup> June)                                                                                                                                                                                                   |
| State level analysis                                                     | Modelling, data analysis                  | Informed extension of local lockdown                                                       | Precision lockdown in specific local areas (29 <sup>th</sup> June)                                                                                                                                                                                                    |
| Interstate transmission                                                  | Modelling                                 | Informed decision to allow domestic air travel                                             | Lifting movement restriction between states (1 <sup>st</sup> July)                                                                                                                                                                                                    |
| Re-opening schools                                                       | Modelling, literature review              | Re-opened schools should have infection mitigation measures                                | Partial re-opening (1 <sup>st</sup> July)<br>States allowed to consider (September)                                                                                                                                                                                   |
| <b>30<sup>th</sup> July to 15<sup>th</sup> September – Phase 3</b>       |                                           |                                                                                            |                                                                                                                                                                                                                                                                       |
| Re-opening borders                                                       | Modelling and other country experience    | Informed discussion on partial lifting of the international travel ban                     | International airports reopened (4 <sup>th</sup> September)                                                                                                                                                                                                           |
| State level papers*                                                      | Modelling                                 | Inform state discussions on more testing, palliatives and precision lockdown.              | State level distribution of data (Multiple dates between June-Sept)                                                                                                                                                                                                   |
| Timing of entry tests                                                    | Modelling, literature review              | Inform discussion on pre-arrival, on entry and post arrival testing to lift self-isolation | Testing at day 7/8 after arrival (4 <sup>th</sup> September)                                                                                                                                                                                                          |

\* Adamawa, Bauchi, Bayelsa, Borno, Delta, Ebonyi, Edo, Enugu, FCT, Gombe, Jigawa, Kaduna, Kano, Katsina, Kwara, Lagos, Nassarawa, Ogun, Ondo, Oyo, Plateau, Rivers, Sokoto, Yobe, Zamfara
